# Supplementary material for: Potassium-Induced Phenomena and Their Effects on the Intrinsic Reactivity of Biomass-Derived Char during Steam Gasification
Source: PubMed Central journal article supplement (PMC10433354; doi:10.1021/acsomega.3c02234), 2023-08-01
Supplement: ao3c02234_si_001.pdf [file ao3c02234_si_001.pdf]

## Supporting Information

# Potassium-induced phenomena and their effects on the intrinsic reactivity of biomass-derived char during steam gasification

Saiman Ding, Efthymios Kantarelis, Klas Engvall\*

---

\* To whom correspondence should be addressed [kengval@kth.se](mailto:kengval@kth.se) (K. Engvall)

*KTH Royal Institute of Technology, Department of Chemical Engineering, Stockholm, SE-10044 Sweden.*

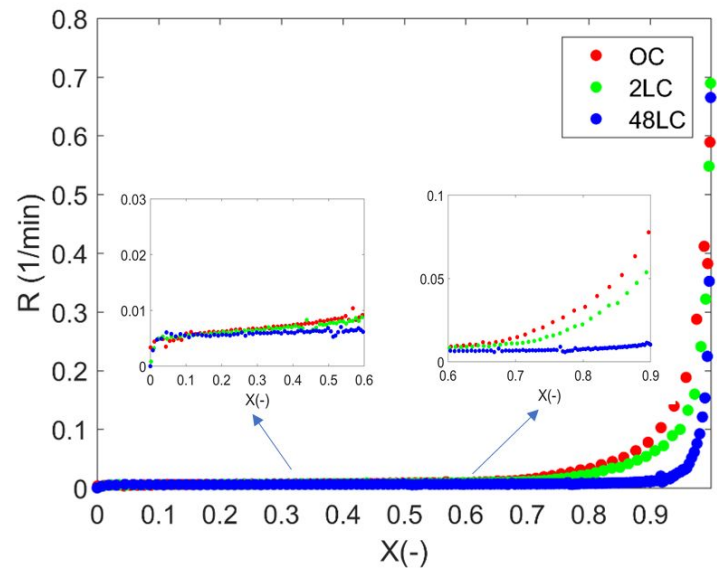

Figure S1. Instantaneous char gasification rates of all samples at 750 °C

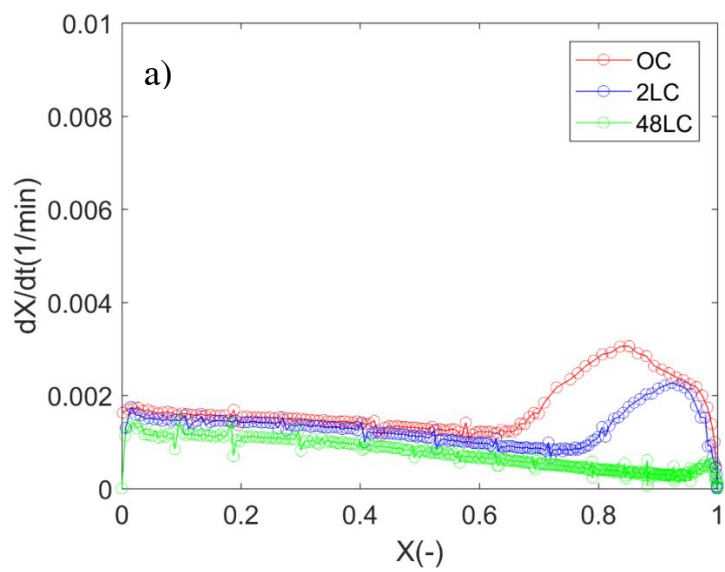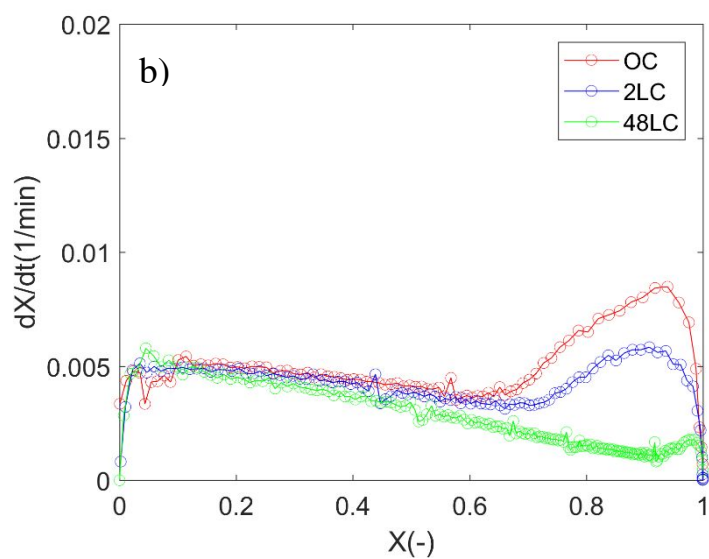

Figure S2 Experimental reactivity vs  $X$  for a) 700°C and b) 750°C for OC, 2LC and 48LC

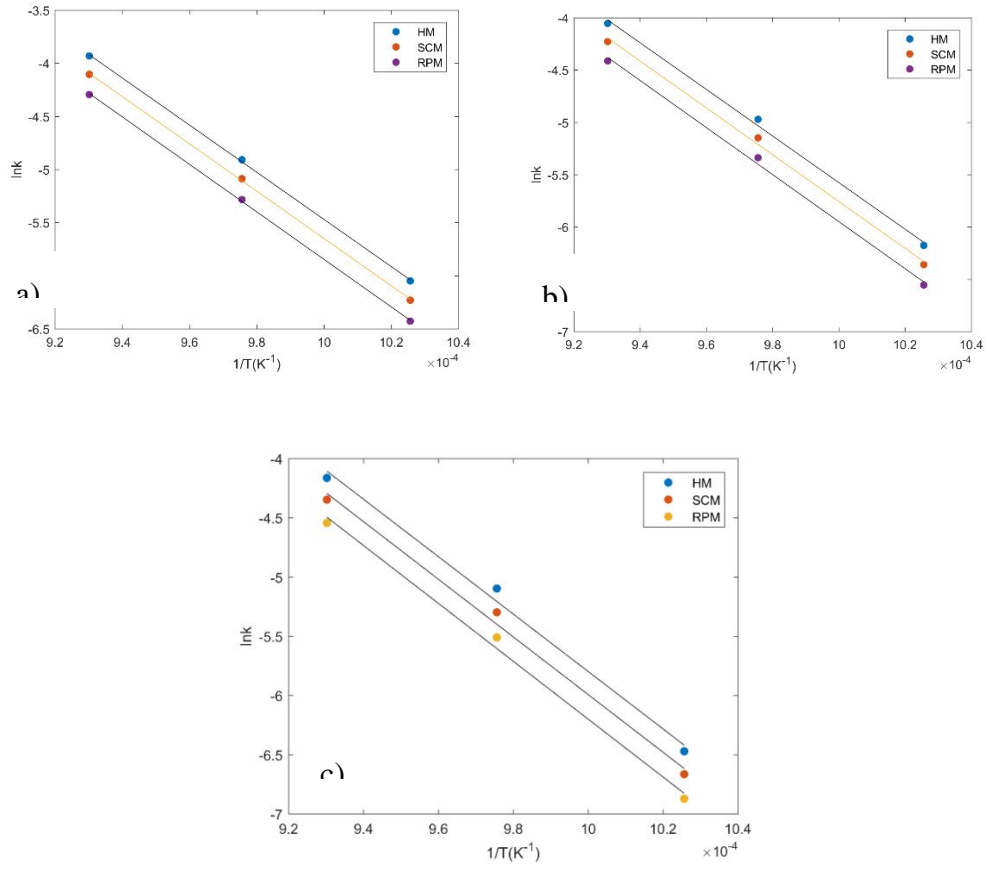

Figure S3. Arrhenius plot of three different models (a) OC (b)2LC (c) 48LC

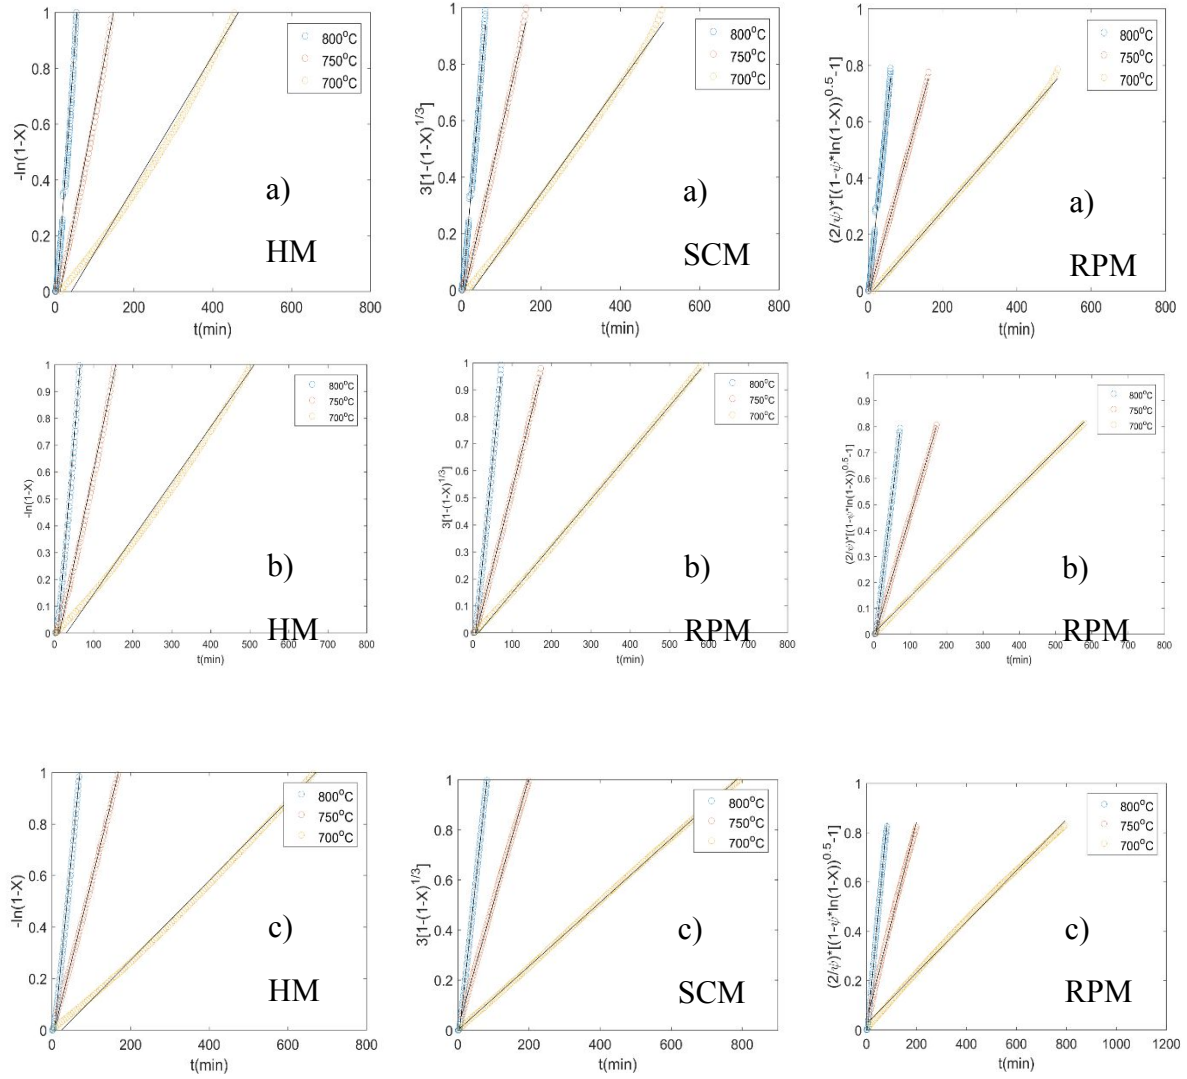

Figure S4. Linearized plot of HM, SCM and RPM models for chars at three different temperatures (a)

OC, b) 2LC, c) 48LC)

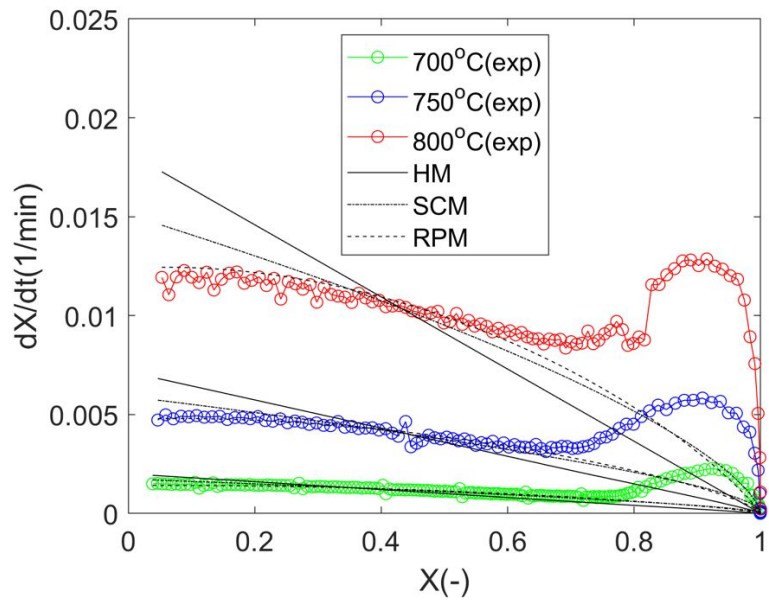

Figure S5. Comparison of the simulated and experimental data  
for gasification of 2LC

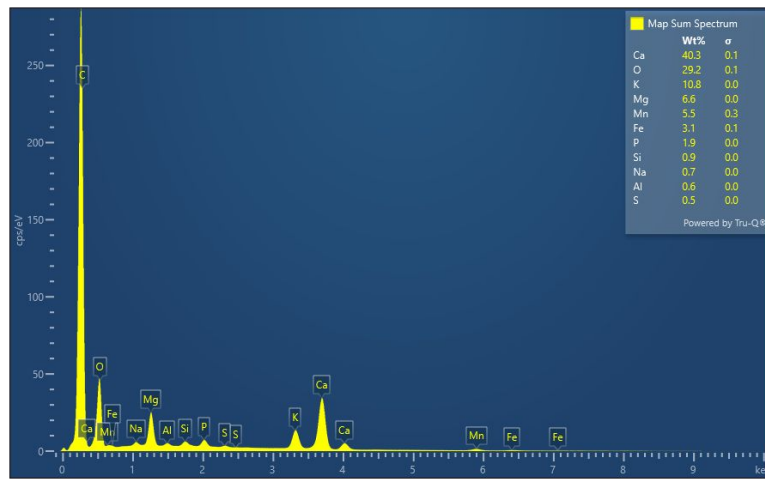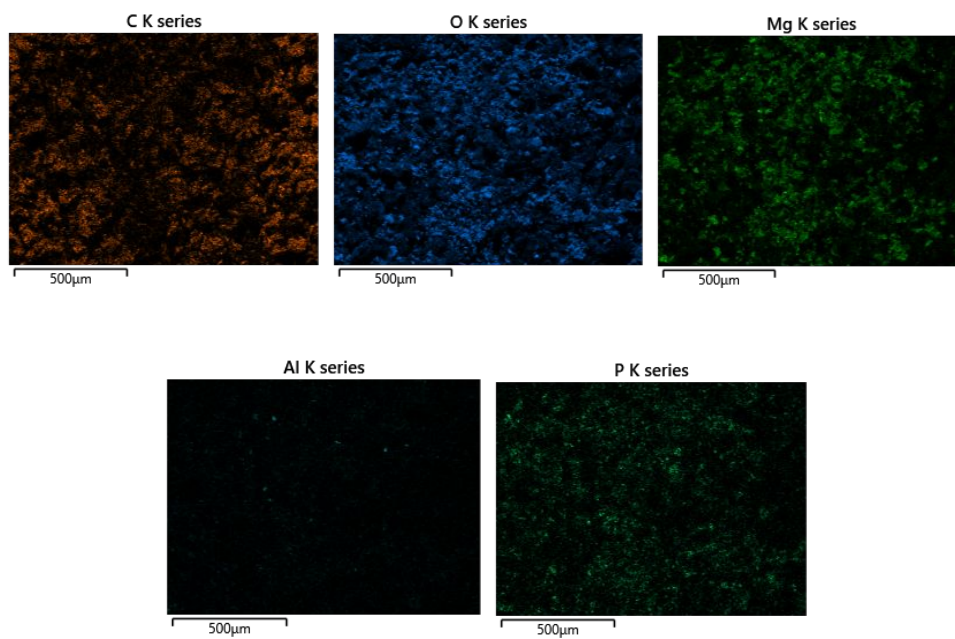

Figure S6. EDS mapping of 75% converted of OC



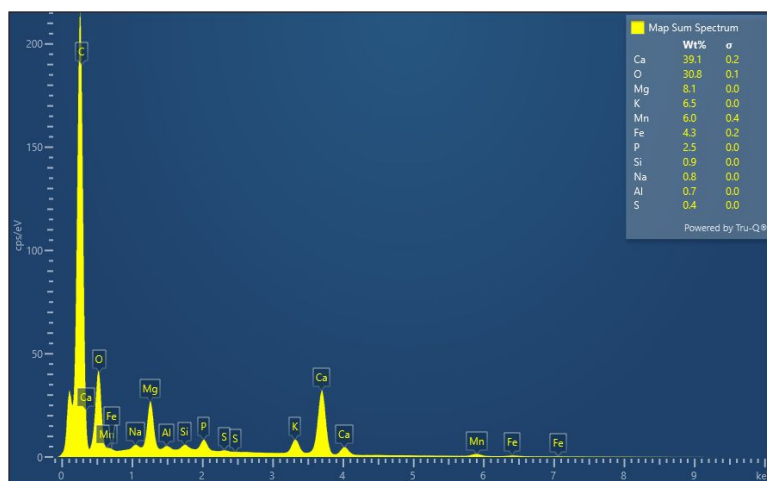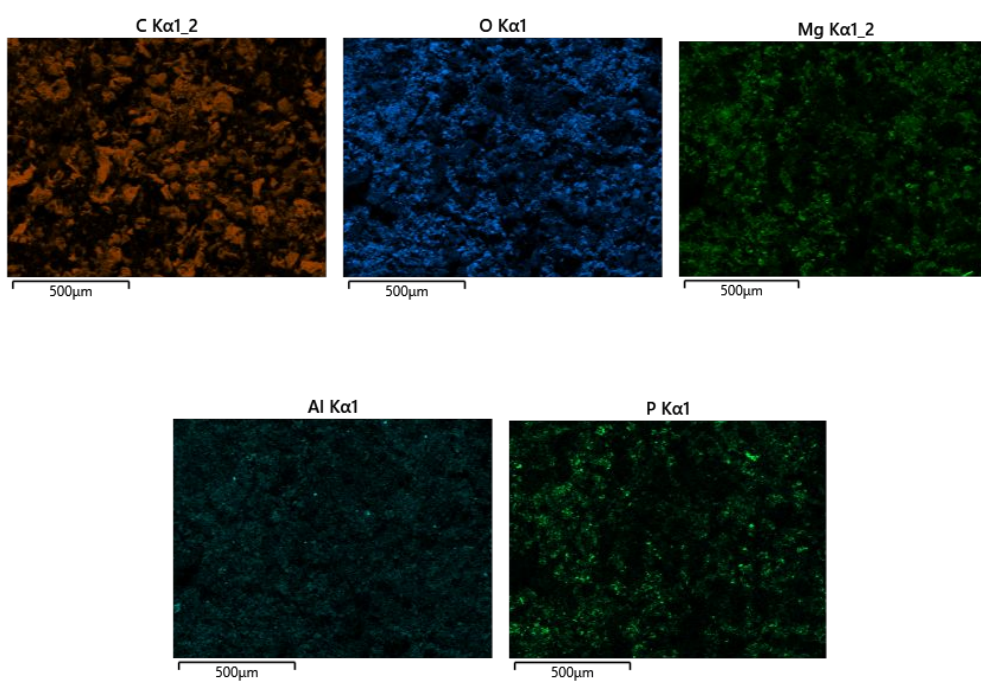

Figure S7. EDS mapping of 80% converted 2LC

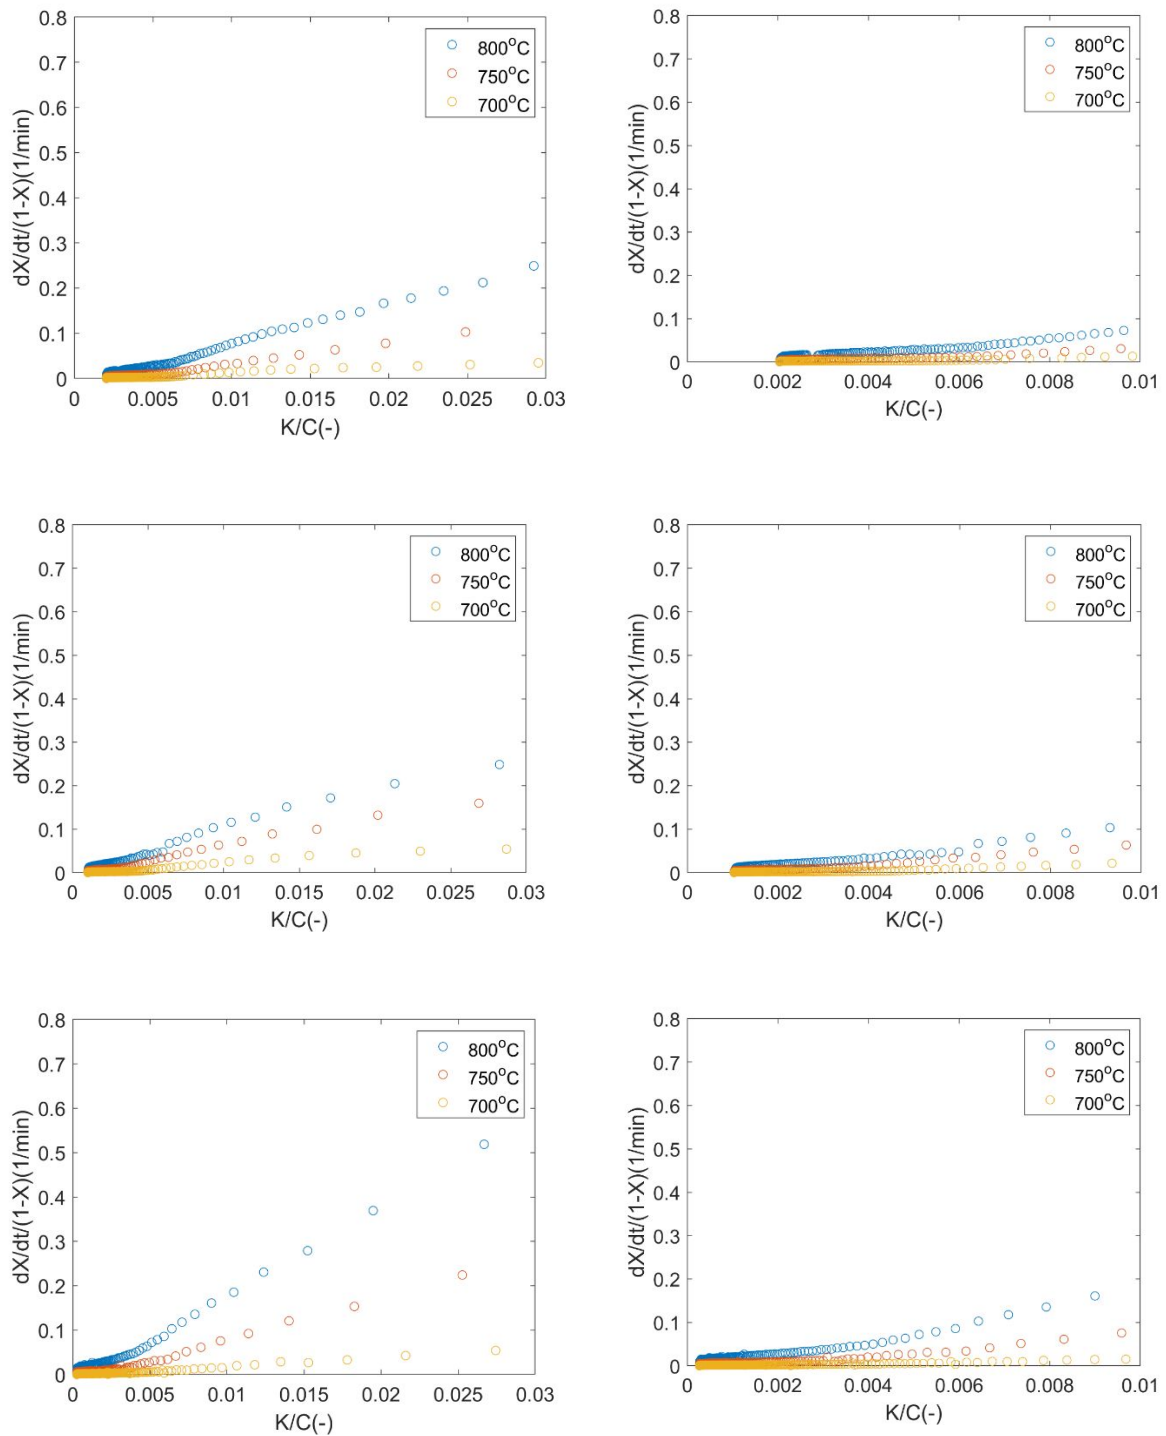

Figure S8. The K/C ratio versus instantaneous gasification rate of different char samples at different temperatures ; top row OC; middle row 2LC; bottom row 48LC.

Table S1. The kinetic parameters and regression coefficients estimated by the MRPM

| <b>Samples</b> | <b>T(°C)</b> | <b><i>k</i>(min<sup>-1</sup>)</b> | <b><math>\psi</math>(-)</b> | <b><i>c</i>(-)</b> | <b><i>p</i>(-)</b> | <b>R<sup>2</sup></b> |
|----------------|--------------|-----------------------------------|-----------------------------|--------------------|--------------------|----------------------|
| OC             | 700          | 0.00148                           | 2.28                        | 1.370              | 9.00               | 0.841                |
|                | 750          | 0.00470                           | 2.28                        | 1.340              | 9.50               | 0.941                |
|                | 800          | 0.01230                           | 2.28                        | 1.330              | 8.20               | 0.890                |
| 2LC            | 700          | 0.00170                           | 2.22                        | 1.240              | 12.88              | 0.923                |
|                | 750          | 0.00600                           | 2.22                        | 1.270              | 10.10              | 0.924                |
|                | 800          | 0.01400                           | 2.22                        | 1.235              | 11.55              | 0.912                |
| 48LC           | 700          | 0.00170                           | 2.17                        | 1.056              | 55.77              | 0.927                |
|                | 750          | 0.00395                           | 2.17                        | 1.06               | 47.96              | 0.95                 |
|                | 800          | 0.01050                           | 2.17                        | 1.06               | 44                 | 0.966                |
